# Supplementary material for: Microbiomes of the Sydney Rock Oyster are acquired through both vertical and horizontal transmission
Source: PubMed Central journal article supplement (PMC9118846; doi:10.1186/s42523-022-00186-9), 2022-05-19
Supplement: 42523_2022_186_MOESM1_ESM.pdf [file 42523_2022_186_MOESM1_ESM.pdf]

**Supplemental information for:**

Microbiomes of the Sydney Rock Oyster are acquired through both vertical and horizontal transmission

**Author names:** Andrea Unzueta-Martínez<sup>1,6</sup>, Elliot Scanes<sup>2,3</sup>, Laura M. Parker<sup>4</sup>, Pauline M. Ross<sup>2</sup>, Wayne O'Connor<sup>5</sup>, Jennifer L. Bowen<sup>1</sup>

**Table S1.** Statistical analysis of the effects of adult tissues, gamete type, and larval stage on Sorensen-Dice dissimilarities of oyster-associated microbial communities. (A) Results of a permutational test for homogeneity of group dispersions (betadisper). (B) Results of PERMANOVA (Adonis), using 999 permutations. (C) Results of pairwise comparisons (pairwiseAdonis).

**A. Homogeneity of group dispersions test:**

| Factor                                  | DF | Sum of Squares | Mean Squares | F      | Pr(>F)  | significance |
|-----------------------------------------|----|----------------|--------------|--------|---------|--------------|
| Adult tissues, laval stage, and gametes | 10 | 0.063081       | 0.0063081    | 2.7811 | 0.00511 | **           |
| Residuals                               | 84 | 0.19053        | 0.0022682    |        |         |              |

**C. PEMAANOVA:**

| Factor                                  | Df | Sum of Squares | Mean Squares | F Model | R2      | Pr(>F) | significance |
|-----------------------------------------|----|----------------|--------------|---------|---------|--------|--------------|
| Adult tissues, laval stage, and gametes | 10 | 11.035         | 1.1035       | 2.9159  | 0.25768 | 0.001  | ***          |
| Residuals                               | 84 | 31.787         | 0.378416667  |         | 0.74232 |        |              |
| Total                                   | 94 | 42.822         |              |         | 1       |        |              |

**D. Pairwise comparisons of PERMANOVA:**

| Pairs                        | Df | SumsOfSqs | F.Model  | R2         | p.value | p.adjusted | significance |
|------------------------------|----|-----------|----------|------------|---------|------------|--------------|
| Ds_day1 vs Ds_day3           | 1  | 0.7505393 | 2.16809  | 0.08614441 | 0.001   | 0.021      | .            |
| Ds_day1 vs eyedpedi_day29    | 1  | 1.1148419 | 3.316702 | 0.15559171 | 0.001   | 0.021      | .            |
| Ds_day1 vs spat_day34        | 1  | 1.061429  | 2.989227 | 0.14241722 | 0.001   | 0.021      | .            |
| Ds_day1 vs umbo_day15        | 1  | 1.166573  | 3.420755 | 0.14007572 | 0.001   | 0.021      | .            |
| Ds_day1 vs eggs              | 1  | 0.9104951 | 2.566942 | 0.1311877  | 0.001   | 0.021      | .            |
| Ds_day1 vs gill              | 1  | 2.2569566 | 6.96285  | 0.24040626 | 0.001   | 0.021      | .            |
| Ds_day1 vs gonad             | 1  | 1.6398473 | 4.490522 | 0.16951429 | 0.001   | 0.021      | .            |
| Ds_day1 vs mantle            | 1  | 1.7275726 | 4.816204 | 0.1796005  | 0.001   | 0.021      | .            |
| Ds_day1 vs stomach           | 1  | 1.7001327 | 4.818139 | 0.18661837 | 0.001   | 0.021      | .            |
| Ds_day1 vs sperm             | 1  | 1.1501343 | 3.259619 | 0.16089241 | 0.001   | 0.021      | .            |
| Ds_day3 vs eyedpedi_day29    | 1  | 0.9494599 | 2.586022 | 0.14704984 | 0.001   | 0.021      | .            |
| Ds_day3 vs spat_day34        | 1  | 0.8761088 | 2.247027 | 0.1302849  | 0.001   | 0.021      | .            |
| Ds_day3 vs umbo_day15        | 1  | 0.9163768 | 2.492218 | 0.12161779 | 0.001   | 0.021      | .            |
| Ds_day3 vs eggs              | 1  | 0.8509958 | 2.17137  | 0.13427247 | 0.001   | 0.021      | .            |
| Ds_day3 vs gill              | 1  | 1.9049167 | 5.493786 | 0.22429304 | 0.001   | 0.021      | .            |
| Ds_day3 vs gonad             | 1  | 1.3962465 | 3.541464 | 0.15710888 | 0.001   | 0.021      | .            |
| Ds_day3 vs mantle            | 1  | 1.4712401 | 3.80407  | 0.16681541 | 0.001   | 0.021      | .            |
| Ds_day3 vs stomach           | 1  | 1.4568705 | 3.818792 | 0.17502309 | 0.001   | 0.021      | .            |
| Ds_day3 vs sperm             | 1  | 0.9972382 | 2.559242 | 0.15455067 | 0.001   | 0.021      | .            |
| eyedpedi_day29 vs spat_day34 | 1  | 0.5425834 | 1.37825  | 0.12113024 | 0.024   | 1          | .            |
| eyedpedi_day29 vs umbo_day15 | 1  | 0.6611302 | 1.826009 | 0.12316257 | 0.001   | 0.021      | .            |
| eyedpedi_day29 vs eggs       | 1  | 0.7600548 | 1.913352 | 0.17532215 | 0.002   | 0.11       | .            |
| eyedpedi_day29 vs gill       | 1  | 1.4921975 | 4.467306 | 0.24190348 | 0.001   | 0.021      | .            |
| eyedpedi_day29 vs gonad      | 1  | 1.0927931 | 2.742176 | 0.16378851 | 0.001   | 0.021      | .            |
| eyedpedi_day29 vs mantle     | 1  | 1.171469  | 3.016677 | 0.1772777  | 0.001   | 0.021      | .            |
| eyedpedi_day29 vs stomach    | 1  | 1.1452102 | 3.004401 | 0.18772341 | 0.001   | 0.021      | .            |
| eyedpedi_day29 vs sperm      | 1  | 0.8992472 | 2.283922 | 0.20240496 | 0.001   | 0.021      | .            |
| spat_day34 vs umbo_day15     | 1  | 0.7447548 | 1.917947 | 0.12856641 | 0.001   | 0.021      | .            |
| spat_day34 vs eggs           | 1  | 0.6598677 | 1.516424 | 0.14419575 | 0.003   | 0.165      | .            |
| spat_day34 vs gill           | 1  | 1.2779792 | 3.565819 | 0.20299761 | 0.001   | 0.021      | .            |
| spat_day34 vs gonad          | 1  | 0.900407  | 2.129206 | 0.13200937 | 0.001   | 0.021      | .            |
| spat_day34 vs mantle         | 1  | 0.9678319 | 2.345113 | 0.14347485 | 0.001   | 0.021      | .            |
| spat_day34 vs stomach        | 1  | 0.9836047 | 2.41421  | 0.15662234 | 0.001   | 0.021      | .            |
| spat_day34 vs sperm          | 1  | 0.7510169 | 1.739917 | 0.16200468 | 0.004   | 0.22       | .            |
| umbo_day15 vs eggs           | 1  | 0.8016822 | 2.052793 | 0.14607725 | 0.002   | 0.11       | .            |
| umbo_day15 vs gill           | 1  | 1.7410025 | 5.113853 | 0.23125111 | 0.001   | 0.021      | .            |
| umbo_day15 vs gonad          | 1  | 1.2077541 | 3.068831 | 0.1529153  | 0.001   | 0.021      | .            |
| umbo_day15 vs mantle         | 1  | 1.3109579 | 3.403585 | 0.16681309 | 0.001   | 0.021      | .            |
| umbo_day15 vs stomach        | 1  | 1.2845592 | 3.387907 | 0.17474331 | 0.001   | 0.021      | .            |
| umbo_day15 vs sperm          | 1  | 0.955566  | 2.463424 | 0.17032097 | 0.002   | 0.11       | .            |
| eggs vs gill                 | 1  | 1.0282107 | 2.870901 | 0.18089086 | 0.001   | 0.021      | .            |
| eggs vs gonad                | 1  | 0.6233858 | 1.457884 | 0.10083658 | 0.001   | 0.021      | .            |
| eggs vs mantle               | 1  | 0.704139  | 1.690078 | 0.11504897 | 0.003   | 0.165      | .            |
| eggs vs stomach              | 1  | 0.7660537 | 1.86279  | 0.13437339 | 0.002   | 0.11       | .            |
| eggs vs sperm                | 1  | 0.5577293 | 1.266438 | 0.13666939 | 0.026   | 1          | .            |
| gill vs gonad                | 1  | 1.163073  | 3.143447 | 0.14867239 | 0.001   | 0.021      | .            |
| gill vs mantle               | 1  | 0.891905  | 2.463283 | 0.12037575 | 0.001   | 0.021      | .            |
| gill vs stomach              | 1  | 1.2713987 | 3.580745 | 0.17398518 | 0.001   | 0.021      | .            |
| gill vs sperm                | 1  | 1.0234818 | 2.877207 | 0.18121617 | 0.001   | 0.021      | .            |
| gonad vs mantle              | 1  | 0.5506568 | 1.33578  | 0.06908332 | 0.023   | 1          | .            |
| gonad vs stomach             | 1  | 0.6428328 | 1.574906 | 0.08478675 | 0.002   | 0.11       | .            |
| gonad vs sperm               | 1  | 0.7363256 | 1.731846 | 0.11755799 | 0.001   | 0.021      | .            |
| mantle vs stomach            | 1  | 0.8247523 | 2.06298  | 0.10821918 | 0.001   | 0.021      | .            |
| mantle vs sperm              | 1  | 0.74155   | 1.790308 | 0.12104602 | 0.001   | 0.021      | .            |
| stomach vs sperm             | 1  | 0.8506972 | 2.081934 | 0.14784432 | 0.001   | 0.021      | .            |

**Table S2.** Statistical analysis of the effects of the environment (feed and tank water) and larval stage on Sorensen-Dice dissimilarities of oyster-associated microbial communities. (A) Results of a permutational test for homogeneity of group dispersions (betadisper). (B) Results of PERMANOVA (Adonis), using 999 permutations. (C) Results of pairwise comparisons (PairwiseAdonis).

**A. Homogeneity of group dispersions test:**

| Factor                       | DF | Sums of Squares | Mean Square | F      | Pr(>F) | significance |
|------------------------------|----|-----------------|-------------|--------|--------|--------------|
| Larval stage and environmnet | 6  | 0.019089        | 0.0047722   | 1.5505 | 0.2057 | NS           |
| Residuals                    | 41 | 0.12619         | 0.0030778   |        |        |              |

**B. PERMANOVA:**

| Factor                       | DF | Sum of Squares | Mean Squares | F Model | R2      | Pr(>F) | significance |
|------------------------------|----|----------------|--------------|---------|---------|--------|--------------|
| Larval stage and environmnet | 6  | 6.476          | 1.07933      | 2.9731  | 0.23522 | 0.001  | ***          |
| Residuals                    | 58 | 21.056         | 0.36303      | 0.76478 |         |        |              |
| Total                        | 64 | 27.532         |              |         |         |        |              |

**C. Pairwise comparisons:**

| Pairs          |    | Df             | SumsOfSqs | F.Model   | R2        | p.value   | p.adjusted | significance |   |
|----------------|----|----------------|-----------|-----------|-----------|-----------|------------|--------------|---|
| Ds_day1        | vs | Ds_day3        | 1         | 0.9288594 | 6.030348  | 0.2151364 | 0.001      | 0.021        | . |
| Ds_day1        | vs | eyedpedi_day29 | 1         | 1.9201005 | 11.546303 | 0.4044763 | 0.001      | 0.021        | . |
| Ds_day1        | vs | spat_day34     | 1         | 2.2119505 | 13.669189 | 0.4456978 | 0.001      | 0.021        | . |
| Ds_day1        | vs | umbo_day15     | 1         | 2.5292943 | 15.953654 | 0.4437283 | 0.001      | 0.021        | . |
| Ds_day1        | vs | algae          | 1         | 3.6493241 | 24.462861 | 0.5501864 | 0.001      | 0.021        | . |
| Ds_day1        | vs | water          | 1         | 2.3723006 | 12.466037 | 0.3616905 | 0.001      | 0.021        | . |
| Ds_day3        | vs | eyedpedi_day29 | 1         | 1.4023679 | 4.953297  | 0.2482445 | 0.002      | 0.042        | . |
| Ds_day3        | vs | spat_day34     | 1         | 1.3571353 | 4.880977  | 0.2455099 | 0.001      | 0.021        | . |
| Ds_day3        | vs | umbo_day15     | 1         | 1.4747988 | 5.782836  | 0.2431517 | 0.001      | 0.021        | . |
| Ds_day3        | vs | algae          | 1         | 2.0595343 | 8.41904   | 0.3186732 | 0.001      | 0.021        | . |
| Ds_day3        | vs | water          | 1         | 1.3130333 | 4.684078  | 0.1897611 | 0.001      | 0.021        | . |
| eyedpedi_day29 | vs | spat_day34     | 1         | 0.7289794 | 2.019873  | 0.1680445 | 0.003      | 0.063        |   |
| eyedpedi_day29 | vs | umbo_day15     | 1         | 0.7511543 | 2.423743  | 0.1571436 | 0.001      | 0.021        | . |
| eyedpedi_day29 | vs | algae          | 1         | 1.4982533 | 5.070026  | 0.2805766 | 0.002      | 0.042        | . |
| eyedpedi_day29 | vs | water          | 1         | 1.2023961 | 3.575214  | 0.1924723 | 0.001      | 0.021        | . |
| spat_day34     | vs | umbo_day15     | 1         | 0.9916723 | 3.26141   | 0.2005613 | 0.001      | 0.021        | . |
| spat_day34     | vs | algae          | 1         | 1.0908377 | 3.765933  | 0.2246182 | 0.001      | 0.021        | . |
| spat_day34     | vs | water          | 1         | 1.2949102 | 3.909255  | 0.2067376 | 0.001      | 0.021        | . |
| umbo_day15     | vs | algae          | 1         | 1.4933415 | 5.708722  | 0.2629691 | 0.001      | 0.021        | . |
| umbo_day15     | vs | water          | 1         | 1.6610045 | 5.548505  | 0.2356203 | 0.001      | 0.021        | . |
| algae          | vs | water          | 1         | 2.2620089 | 7.828144  | 0.3030858 | 0.001      | 0.021        | . |

**Table S3.** Statistical analysis of the effects of family on Sorensen-Dice dissimilarities of oyster-associated microbial communities. (A) Results of a permutational test for homogeneity of group dispersions (betadisper). (B) Results of PERMANOVA (Adonis), using 999 permutations.

**A. Homogeneity of group dispersions test:**

| Factor    | DF | Sums of Squares | Mean Square | F      | Pr(>F) | significance |
|-----------|----|-----------------|-------------|--------|--------|--------------|
| Family    | 4  | 0.019089        | 0.0047722   | 1.5505 | 0.204  | NS           |
| Residuals | 41 | 0.12619         | 0.0030778   |        |        |              |

**B. PERMANOVA:**

| Factor    | DF | Sum of Squares | Mean Squares | F Model | R2      | Pr(>F) | significance |
|-----------|----|----------------|--------------|---------|---------|--------|--------------|
| Family    | 4  | 1.7            | 0.425        | 1.0601  | 0.09373 | 0.204  | NS           |
| Residuals | 41 | 16.437         | 0.400902439  |         | 0.90627 |        |              |
| Total     | 45 | 18.137         |              |         | 1       |        |              |

**Table S4.** Taxonomic information, identified by comparison with the Silva database, of 30 amplicon sequence variants (ASVs) with most important contributions to a Random Forest regression model trained to predict larval stage from microbial community composition.

| Kingdom  | Phylum         | Class               | Order             | Family               | Genus           | ASV     | Sequence Md5 hash ID                                |
|----------|----------------|---------------------|-------------------|----------------------|-----------------|---------|-----------------------------------------------------|
| Bacteria | Bacteroidetes  | Bacteroidia         | Flavobacteriales  | Flavobacteriaceae    | Kordia          | ASV_2   | 59ccf8d304653395c95d4537eca76a6e                    |
| Bacteria | Proteobacteria | Gammaproteobacteria | Alteromonadales   | Alteromonadaceae     | Aestuariibacter | ASV_4   | bbe8d993a60d3448b591fd119c28452780599458            |
| Bacteria | Proteobacteria | Alphaproteobacteria | Sphingomonadales  | Sphingomonadaceae    | Sphingorhabdus  | ASV_12  | 04cff81844348932067bc099bbbaeeba0476b3c3a           |
| Bacteria | Proteobacteria | Gammaproteobacteria | Cellvibrionales   | Cellvibrionaceae     | Aestuariicella  | ASV_15  | b7f23f4bf88fb0b2c6b82824d33e8782a893083c            |
| Bacteria | Proteobacteria | Gammaproteobacteria | Alteromonadales   | Marinobacteraceae    | Marinobacter    | ASV_19  | de577eac38335e589c5c9ed66d23aaf7b38bcfa1            |
| Bacteria | Proteobacteria | Alphaproteobacteria | Rhizobiales       | Stappiaceae          | Labrenzia       | ASV_25  | 87ebfbd7a84e4677d7b60df7edfa45e62d4def3;size=74339  |
| Bacteria | Proteobacteria | Alphaproteobacteria | Rhodobacterales   | Rhodobacteraceae     | Antarctobacter  | ASV_26  | b6e45e9e6bffa1f2ffb7d6375dfde7da0e4b83af;size=69986 |
| Bacteria | Proteobacteria | Gammaproteobacteria | Alteromonadales   | Alteromonadaceae     | Aestuariibacter | ASV_31  | 119464842cb5358793b492a5d082121831b5b1e0            |
| Bacteria | Proteobacteria | Alphaproteobacteria | Rhodobacterales   | Rhodobacteraceae     | Nautella        | ASV_33  | 637e056b57a8f2cd33312ba5ef812776730645e5            |
| Bacteria | Proteobacteria | Gammaproteobacteria | Cellvibrionales   | Spongiibacteraceae   | Spongiibacter   | ASV_43  | cdea786612b5415a97ad2e49997575e7ee7b3d9a            |
| Bacteria | Proteobacteria | Gammaproteobacteria | Oceanospirillales | Oleiphilaceae        | Oleiphilus      | ASV_59  | 073b0359e8534fe71292b4db9a95727fba1a1c48            |
| Bacteria | Proteobacteria | Gammaproteobacteria | Alteromonadales   | Marinobacteraceae    | Marinobacter    | ASV_63  | f126fbf6e0a0c3e321944a34844d0ef72377d1b             |
| Bacteria | Proteobacteria | Gammaproteobacteria | Oceanospirillales | Oleiphilaceae        | Oleiphilus      | ASV_68  | 692ff2875fb15e9780efd4d80383dc4ef150fa5c            |
| Bacteria | Proteobacteria | Alphaproteobacteria | Sphingomonadales  | Sphingomonadaceae    | NA              | ASV_78  | f9bb73d48255f7bfa615e5eba722862e7b6cc80ac           |
| Bacteria | Proteobacteria | Gammaproteobacteria | Alteromonadales   | Marinobacteraceae    | Marinobacter    | ASV_89  | b380ab07413b5452cfcbbb245ec422a8313a44f5            |
| Bacteria | Proteobacteria | Gammaproteobacteria | Alteromonadales   | Marinobacteraceae    | Marinobacter    | ASV_94  | 4e43625e983c08d5543a79836f5a322acc57a0c9            |
| Bacteria | Proteobacteria | Gammaproteobacteria | Oceanospirillales | Saccharospirillaceae | Bermanella      | ASV_121 | ea3e7cd24ffc41e546033dce18ce1a32ad70063a            |
| Bacteria | Proteobacteria | Gammaproteobacteria | Salinisphaerales  | Salinisphaeraceae    | Salinisphaera   | ASV_123 | 8aa0f891e91dcafd9b9142b8406571d18f03b9ad            |
| Bacteria | Proteobacteria | Alphaproteobacteria | Rhodobacterales   | Rhodobacteraceae     | Ruegeria        | ASV_125 | 97fbcf509eef3b8d527956b26382dcb969d4891             |
| Bacteria | Proteobacteria | Gammaproteobacteria | Alteromonadales   | Alteromonadaceae     | Aestuariibacter | ASV_130 | 9f79a9ab9f3191bb6ff66eb16a5d6eea8a658bf3            |
| Bacteria | Proteobacteria | Alphaproteobacteria | Rhodobacterales   | Rhodobacteraceae     | Thalassobius    | ASV_159 | 5d5ce1621ae721b880a6fa4e9c1c4d40f034a8be            |
| Bacteria | Proteobacteria | Gammaproteobacteria | Cellvibrionales   | Haliaceae            | Pseudohalialia  | ASV_174 | 25dd1bf775f3aece7c10551f3b130720c571223f            |
| Bacteria | Proteobacteria | Gammaproteobacteria | Alteromonadales   | Alteromonadaceae     | XY-R5           | ASV_198 | 6eed584613ef3a2e903c89d61c680029951a4d23            |
| Bacteria | Proteobacteria | Gammaproteobacteria | Alteromonadales   | Alteromonadaceae     | NA              | ASV_249 | ecdffcb6619a79417e1de4ef483bc15bb263d5c7            |
| Bacteria | Proteobacteria | Gammaproteobacteria | Alteromonadales   | Marinobacteraceae    | Marinobacter    | ASV_272 | b94019d443210537ad520a471e96c4d64ab3b49a            |
| Bacteria | Proteobacteria | Alphaproteobacteria | Caulobacterales   | Hyphomonadaceae      | Maricaulis      | ASV_281 | 11dc05b978ff8b8a15e3aa9231765edbee20afc8            |
| Bacteria | Proteobacteria | Alphaproteobacteria | Caulobacterales   | Hyphomonadaceae      | Hyphomonas      | ASV_336 | 513a0b5fae74775db0bf5e8f115d3104bdd4695             |
| Bacteria | Proteobacteria | Deltaproteobacteria | Myxococcales      | Haliangiaceae        | Haliangium      | ASV_379 | a595b48198e077d6ff54f1bfe5c17efa5766277b            |
| Bacteria | Proteobacteria | Alphaproteobacteria | Caulobacterales   | Hyphomonadaceae      | Hyphomonas      | ASV_527 | b3bd97486e864e99eef2b8f461e49ec4b4414c5d            |
| Bacteria | Proteobacteria | Gammaproteobacteria | Cellvibrionales   | Spongiibacteraceae   | BD1-7_clade     | ASV_555 | 8c8a73b022f33c1360db536f38e6055a5f1a938a            |

**Table S5.** Taxonomic information, identified by comparison with the Silva database, of 14 ASVs identified as core members (present at greater than 1% abundance in more than 50% of samples) in the eggs, sperm, and all larval stages. This analysis excluded all ASVs detected in tank water and algae samples with a relative abundance greater than 1%.

| Phylum         | Class               | Order             | Family                 | Genus             | ASV     | Sequence Md5 hash ID                     |
|----------------|---------------------|-------------------|------------------------|-------------------|---------|------------------------------------------|
| Proteobacteria | Gammaproteobacteria | Vibrionales       | Vibrionaceae           | <NA>              | ASV_11  | ae0a06a8a1f235c0059aa19ef8ab090f37abc25e |
| Proteobacteria | Alphaproteobacteria | Rhodobacterales   | Rhodobacteraceae       | Nautella          | ASV_33  | 637e056b57a8f2cd33312ba5ef812776730645e5 |
| Proteobacteria | Gammaproteobacteria | Cellvibrionales   | Spongiibacteraceae     | Spongiibacter     | ASV_43  | cdea786612b5415a97ad2e49997575e7ee7b3d9a |
| Proteobacteria | Gammaproteobacteria | Alteromonadales   | Pseudoalteromonadaceae | Pseudoalteromonas | ASV_44  | baa02e16825b5f16263863ccfc9388065defc9bb |
| Proteobacteria | Gammaproteobacteria | Oceanospirillales | Oleiphilaceae          | Oleiphilus        | ASV_68  | 692ff2875fb15e9780efd4d80383dc4ef150fa5c |
| Bacteroidetes  | Bacteroidia         | Flavobacteriales  | Flavobacteriaceae      | Lutaonella        | ASV_83  | ca080168f52fba62bc6caf5870aafb4375bfdd36 |
| Proteobacteria | Gammaproteobacteria | Oceanospirillales | Saccharospirillaceae   | Bermanella        | ASV_121 | ea3e7cd24ffc41e546033dce18ce1a32ad70063a |
| Proteobacteria | Gammaproteobacteria | Oceanospirillales | Oleiphilaceae          | Oleiphilus        | ASV_141 | 4064c3a4a190731797c92800e5ea21a66b0794ab |
| Proteobacteria | Alphaproteobacteria | Rhodobacterales   | Rhodobacteraceae       | <NA>              | ASV_150 | ee41c2d9cf1bfddedb846f847fe56d21b44a7cc8 |
| Proteobacteria | Alphaproteobacteria | Rhodobacterales   | Rhodobacteraceae       | Thalassobius      | ASV_159 | 5d5ce1621ae721b880a6fa4e9c1c4d40f034a8be |
| Proteobacteria | Gammaproteobacteria | Alteromonadales   | Alteromonadaceae       | XY-R5             | ASV_179 | 087a2484e3677d0922a89c3d7b7dfbde2734e9d7 |
| Proteobacteria | Alphaproteobacteria | Rhodobacterales   | Rhodobacteraceae       | Tropicimonas      | ASV_354 | c6924e36d9992d8a541978ff901b0237a5b111cb |
| Proteobacteria | Gammaproteobacteria | Alteromonadales   | Marinobacteraceae      | Marinobacter      | ASV_263 | fbfbe83b4dd1f7b8edf71a6845a39e5ca43328   |
| Proteobacteria | Gammaproteobacteria | Alteromonadales   | Marinobacteraceae      | Marinobacter      | ASV_272 | b94019d443210537ad520a471e96c4d64ab3b49a |

**Table S6.** Mann-Whitney U test results of comparing the percentage of shared ASVs between larvae and their parent eggs and larvae and their parent sperm for each larval stage. This analysis excluded all ASVs detected in tank water and algae samples with a relative abundance greater than 1%.

| Comparison day | Kruskal-Wallis chi-squared | df | p-value | significance |
|----------------|----------------------------|----|---------|--------------|
| <b>DAY 1</b>   |                            |    |         |              |
| eggs vs. sperm | 3.6573                     | 1  | 0.0548  | .            |
|                |                            |    |         |              |
| <b>DAY 3</b>   |                            |    |         |              |
| eggs vs. sperm | 4.2014                     | 1  | 0.0404  | .            |
|                |                            |    |         |              |
| <b>DAY 15</b>  |                            |    |         |              |
| eggs vs. sperm | 5.4087                     | 1  | 0.0200  | .            |
|                |                            |    |         |              |
| <b>Day 29</b>  |                            |    |         |              |
| eggs vs. sperm | 9.504                      | 1  | 0.0021  | ***          |
|                |                            |    |         |              |
| <b>Day 34</b>  |                            |    |         |              |
| eggs vs. sperm | 2.2331                     | 1  | 0.1251  | NS           |

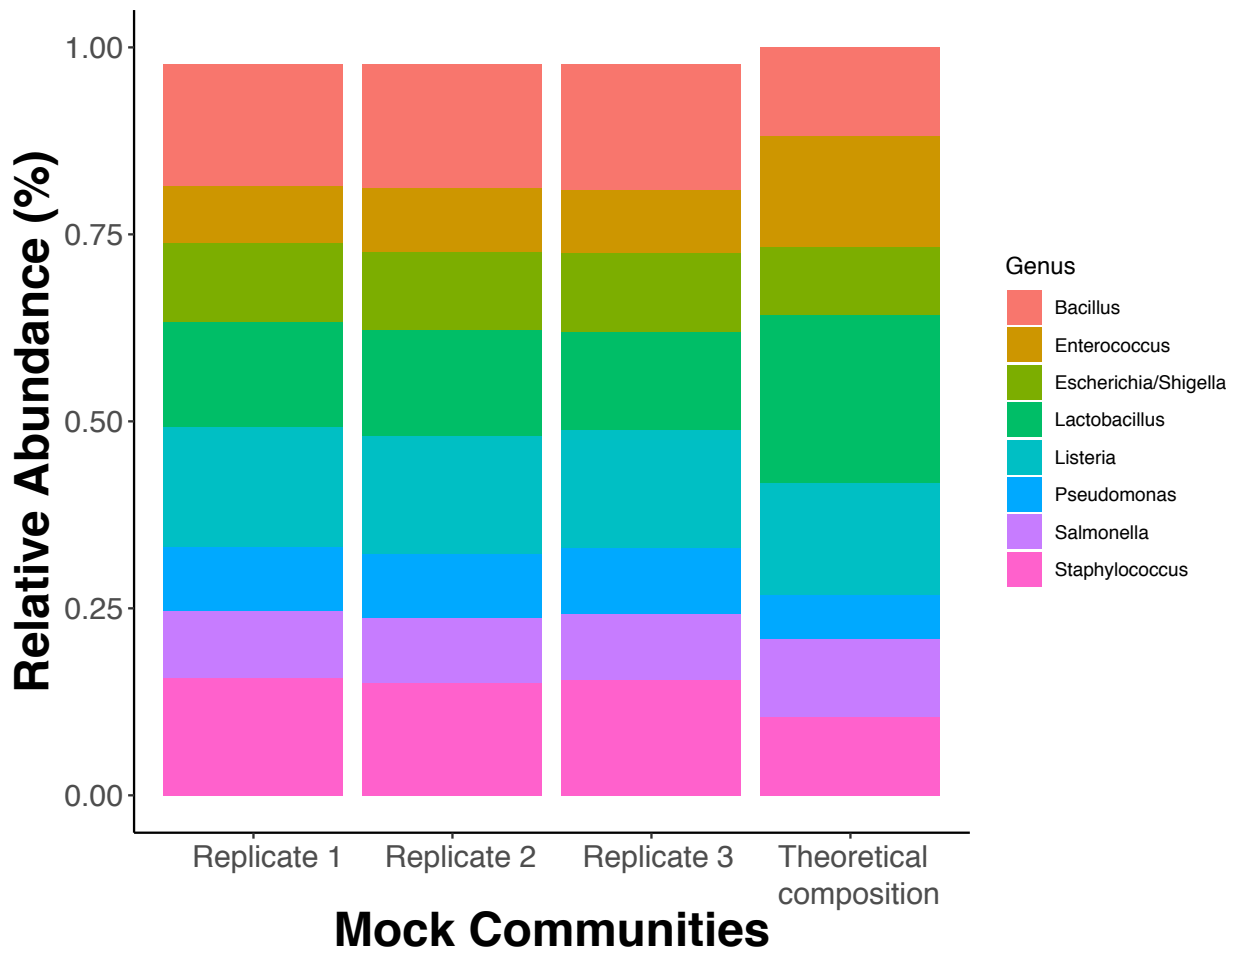

**Figure S1.** Stacked bar plot of the relative abundance of bacterial genera comprising mock community replicates and the theoretical composition. Relative abundance was calculated within each sample and ASVs that made up less than 1% of the sample were excluded.



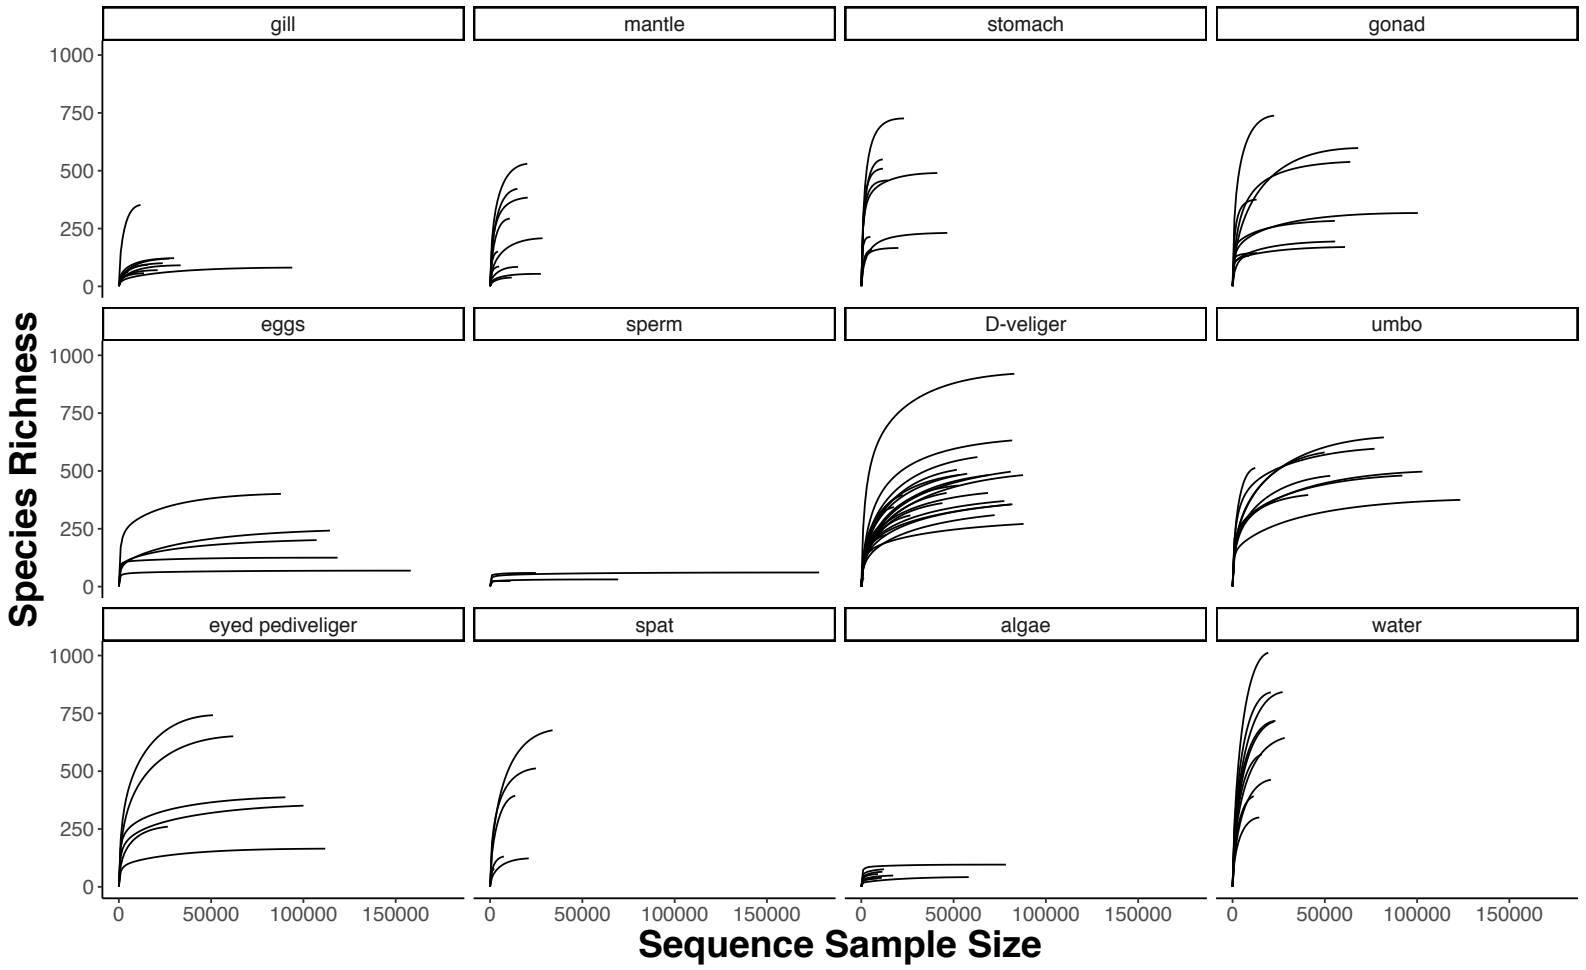

**Figure S2.** Rarefaction curves of the number of ASVs versus the number of sequences in each sample grouped by sample type.

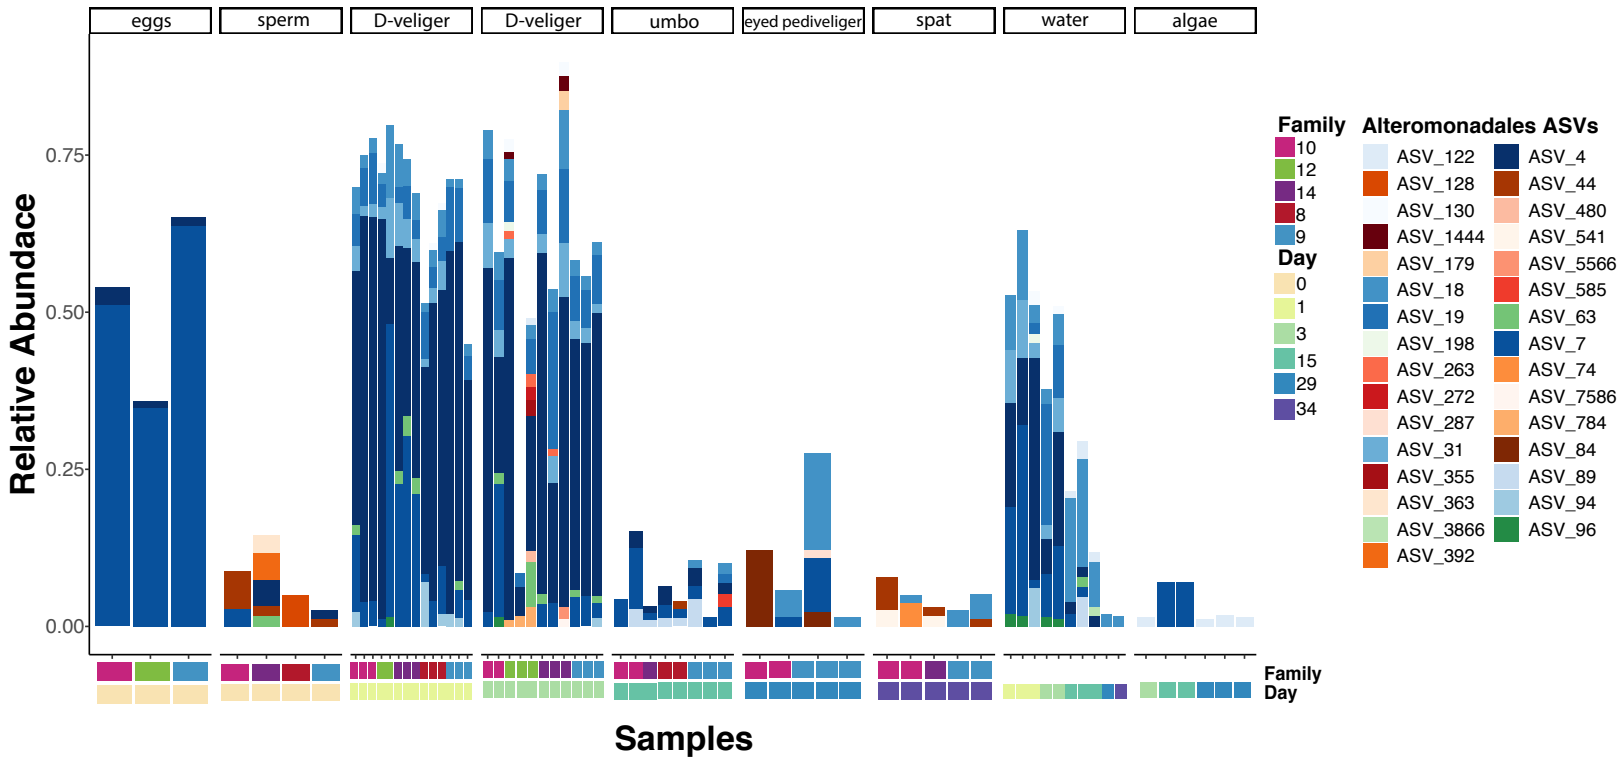

**Figure S3.** Stacked bar plot of the relative abundance of Alteromonadales ASVs associated with oyster tissues (gametes and larvae) and their environment (water and algae). Relative abundance was calculated within each sample. Warm ASV colors (reds and oranges), represent Alteromonadales ASVs that were detected on oyster tissues but not their environment, while cool ASV colors (blues and greens) represent Alteromonadales ASVs that were detected on oyster tissues and their environment. Samples that contained no Alteromonadales ASVs are not depicted in the figure.
